# Supplementary material for: Branched phosphazenium salts as effective and versatile cocatalysts for epoxide/CO2 coupling
Source: Royal Society of Chemistry journal article supplement (doi:10.1039/d2py01471h), 2023-01-01
Supplement: d2py01471h1.pdf [file d2py01471h1.pdf]

## Supporting information

### Branched phosphazene salts as effective, versatile cocatalysts for epoxide/ $\text{CO}_2$ coupling

Massimiliano Brivio<sup>a</sup>, Lorenzo Veronese<sup>a</sup>, Incoronata Tritto<sup>a</sup>, Paolo Biagini<sup>b</sup>, Riccardo Po<sup>b</sup>, Laura Boggioni<sup>a\*</sup>, Simona Losio<sup>a\*</sup>

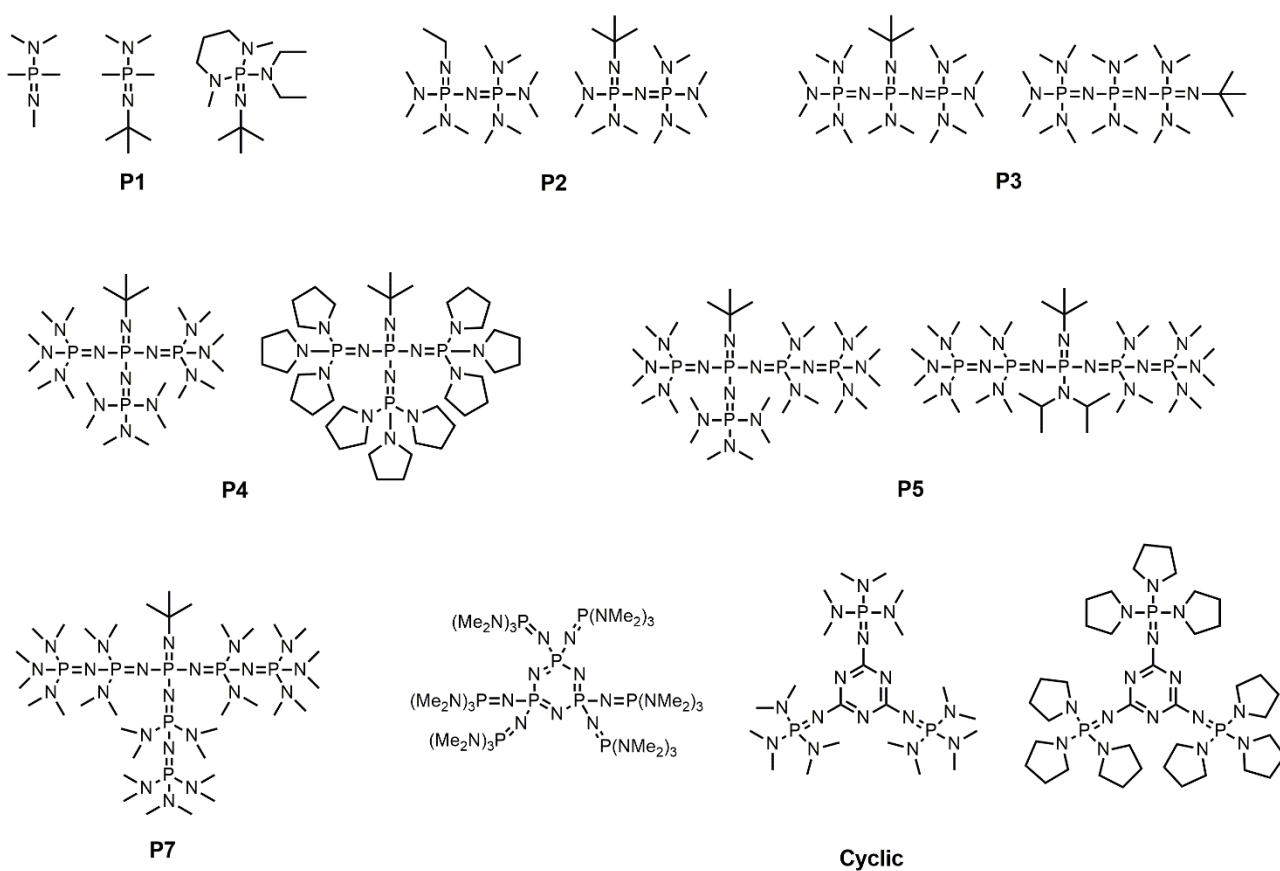

**Figure S1.** Examples of phosphazene bases with different P number and topologies (linear, branched and cyclic)

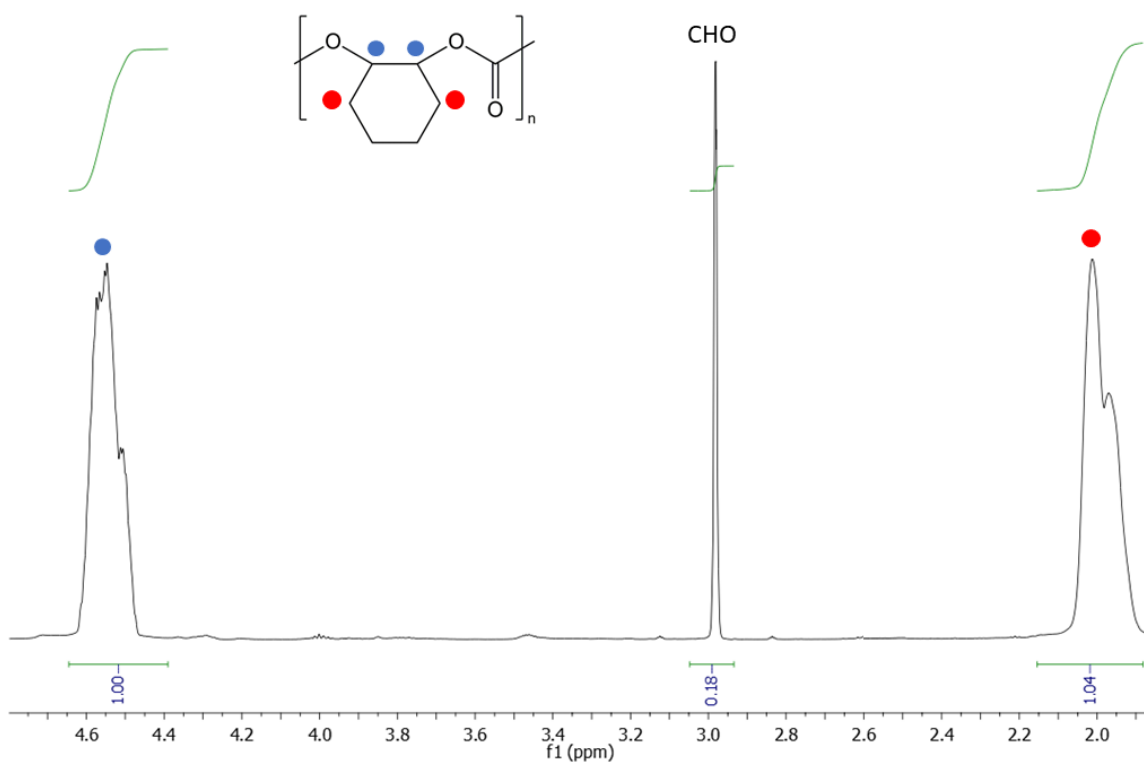

**Figure S2.** <sup>1</sup>H NMR spectrum of the crude PCHC obtained (Table 1, entry 2).

Entry 6 Table 1

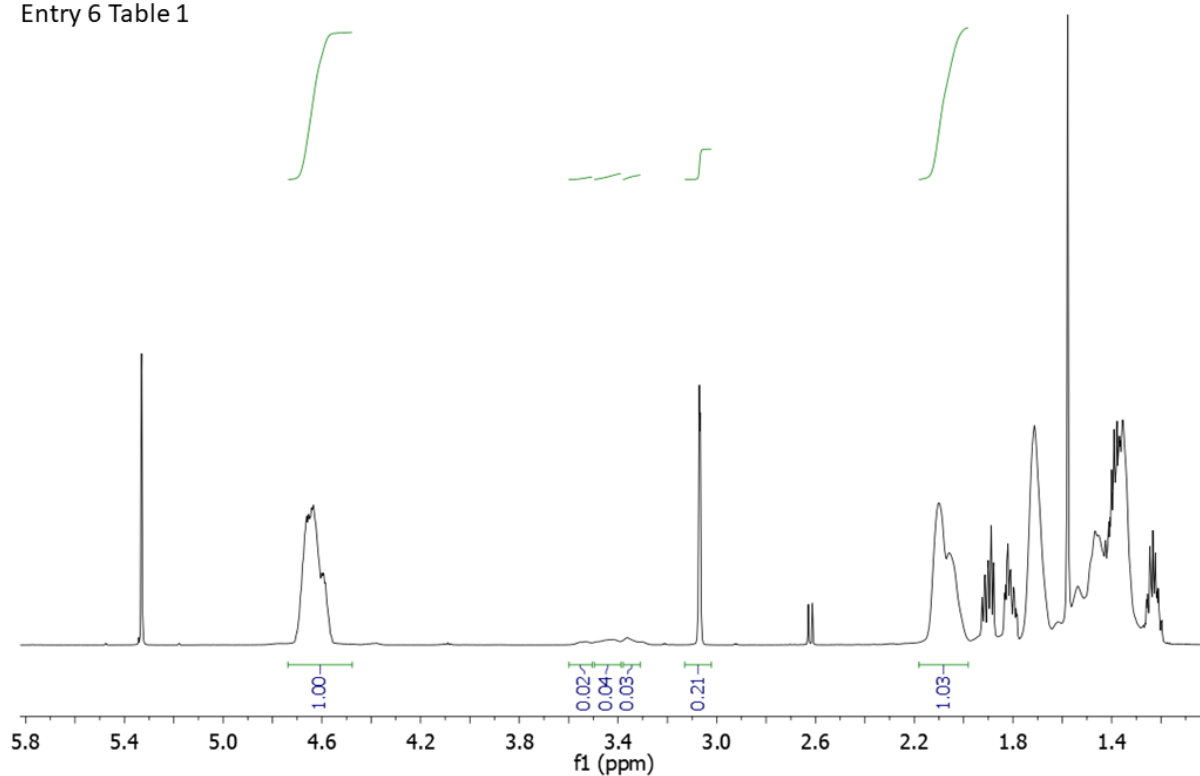

**Figure S3.** <sup>1</sup>H NMR spectrum of the crude PCHC obtained (Table 1, entry 6).

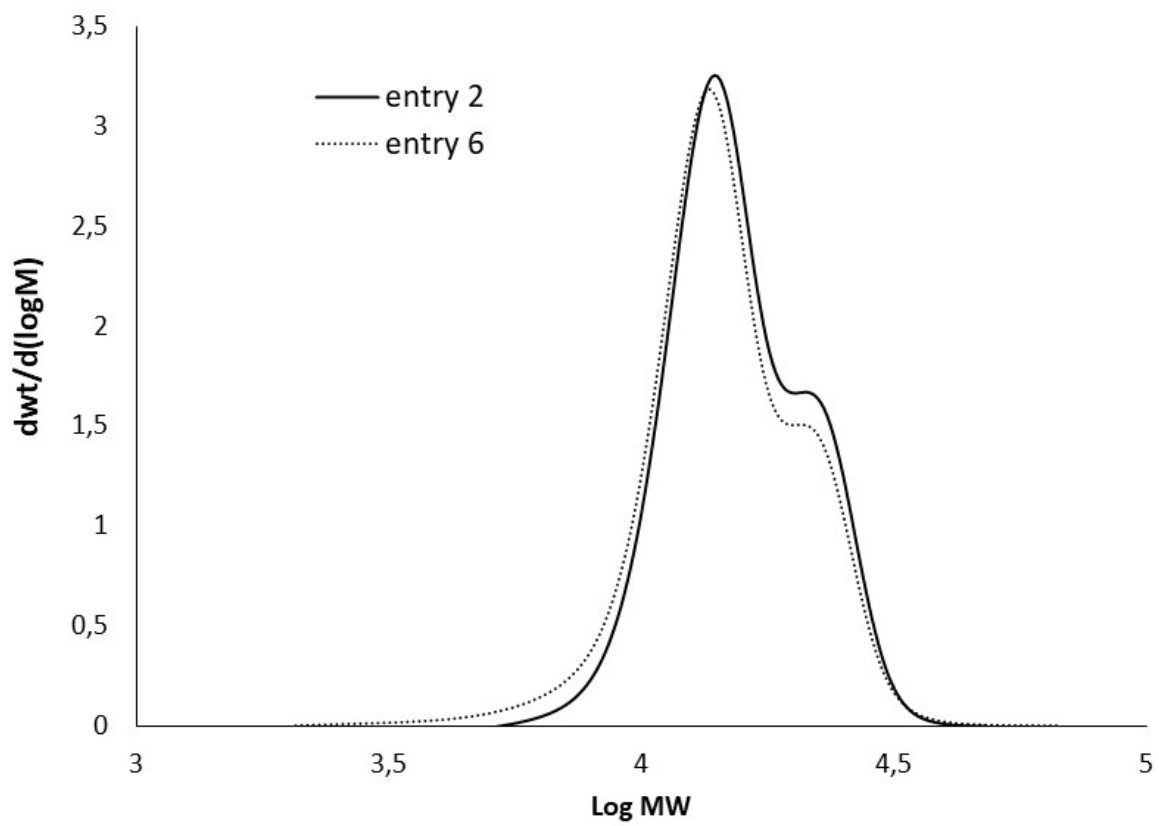

Figure S4. SEC chromatograms of selected samples from Table 1.

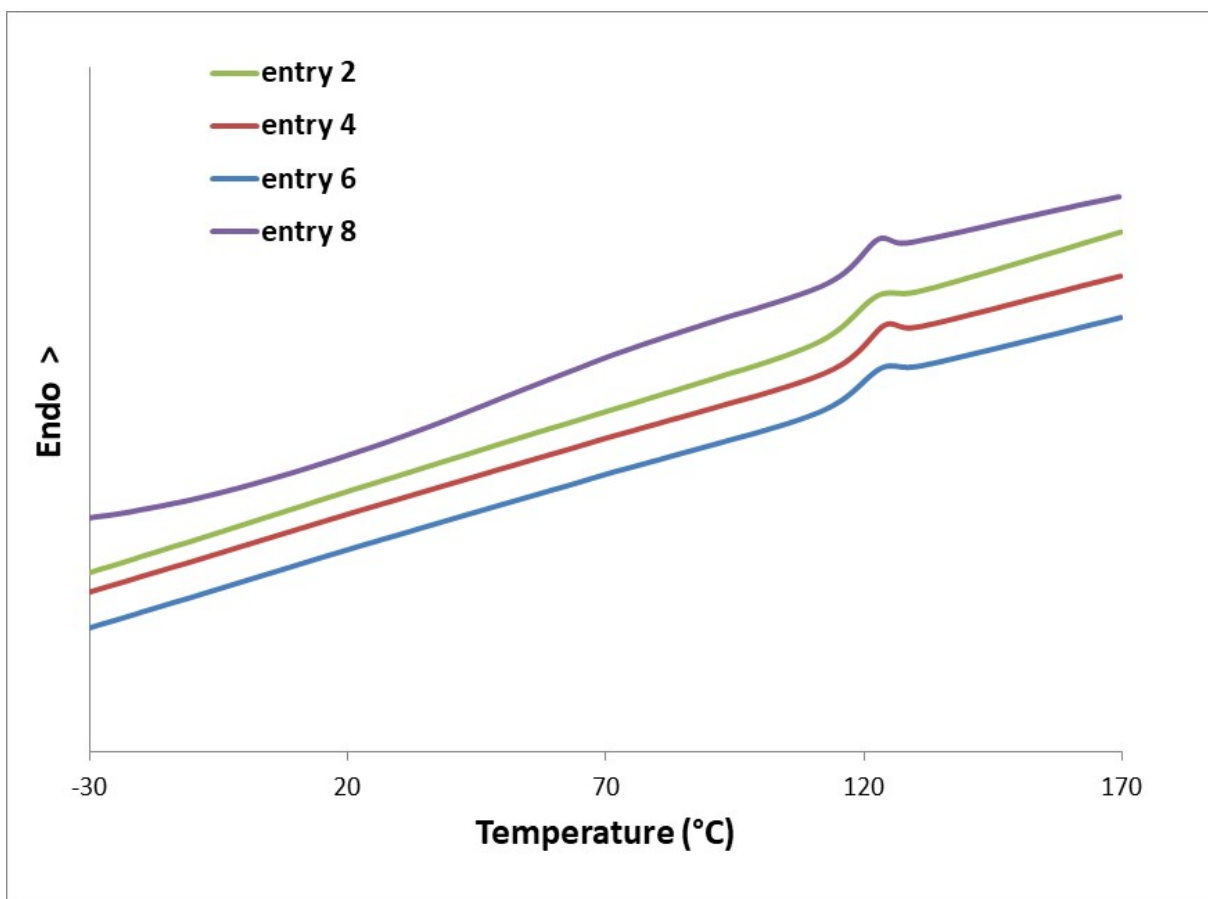

**Figure S5.** DSC thermograms of selected sample from Table 1

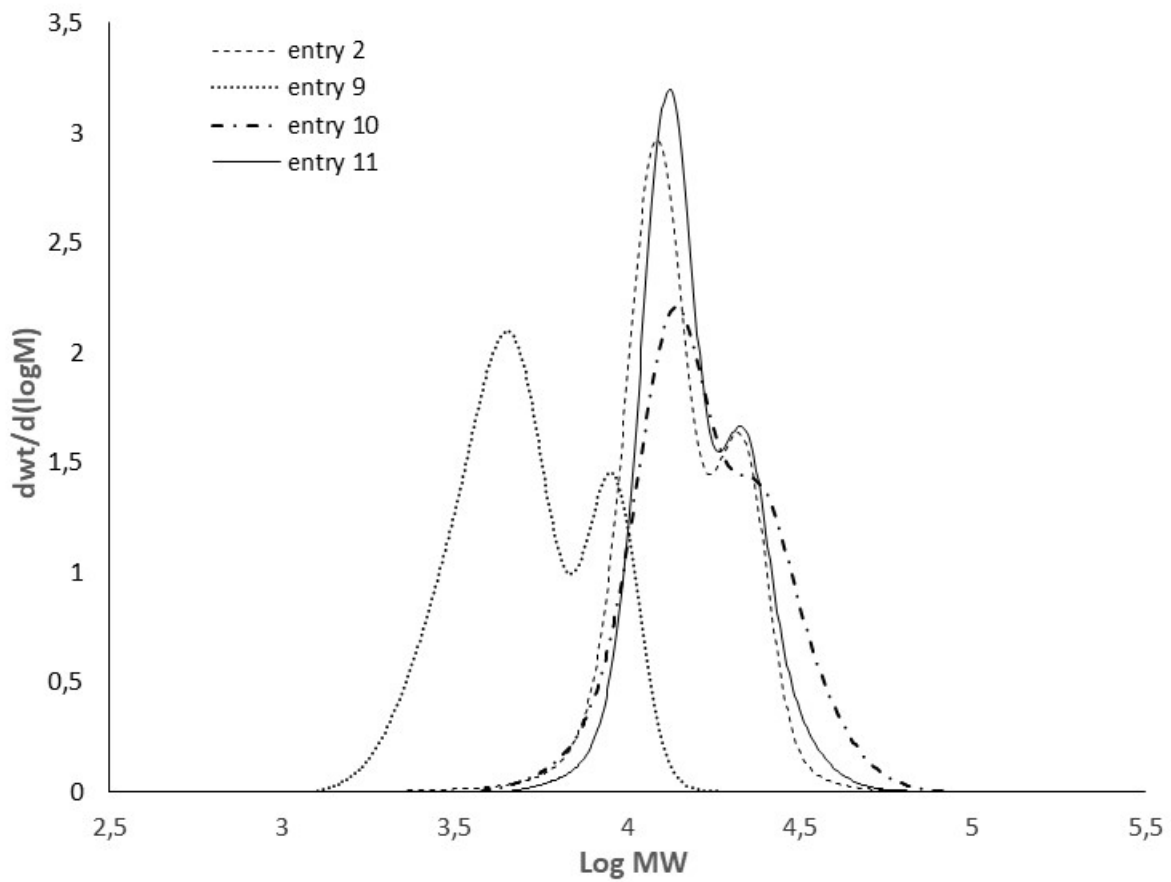

**Figure S6.** SEC chromatograms of selected samples from Table 2

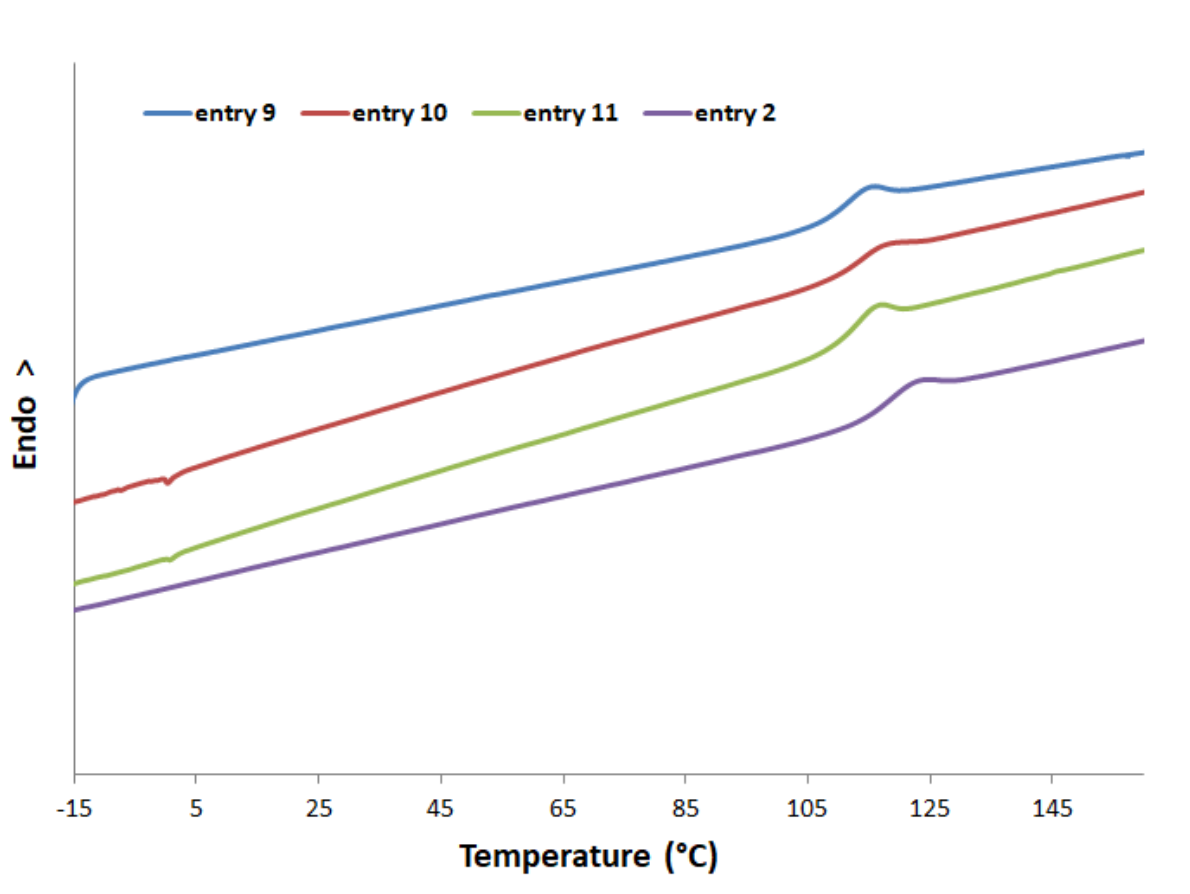

Figure S7. DSC thermograms of selected sample from Table 2

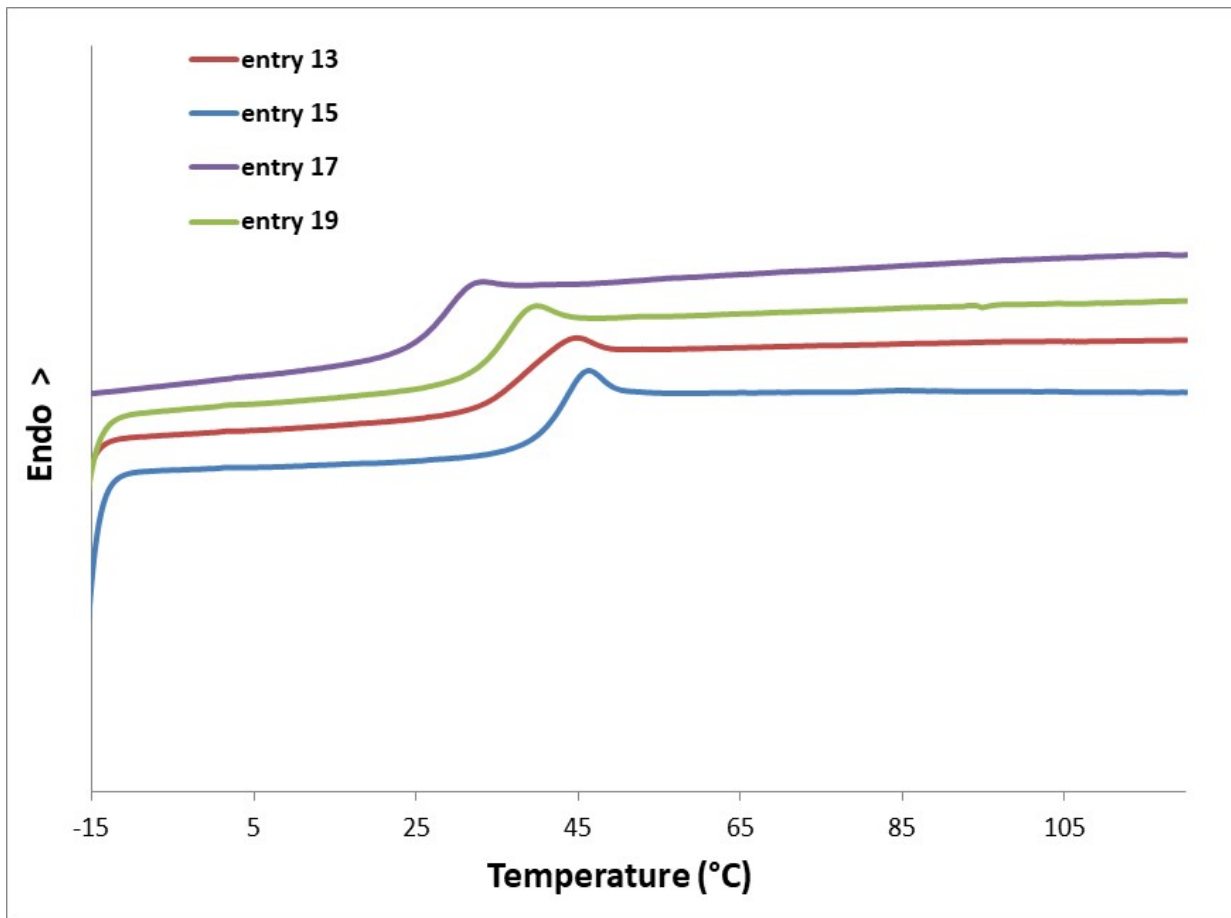

Figure S8. DSC curves of selected samples from Table 3

Entry 17 Table 3

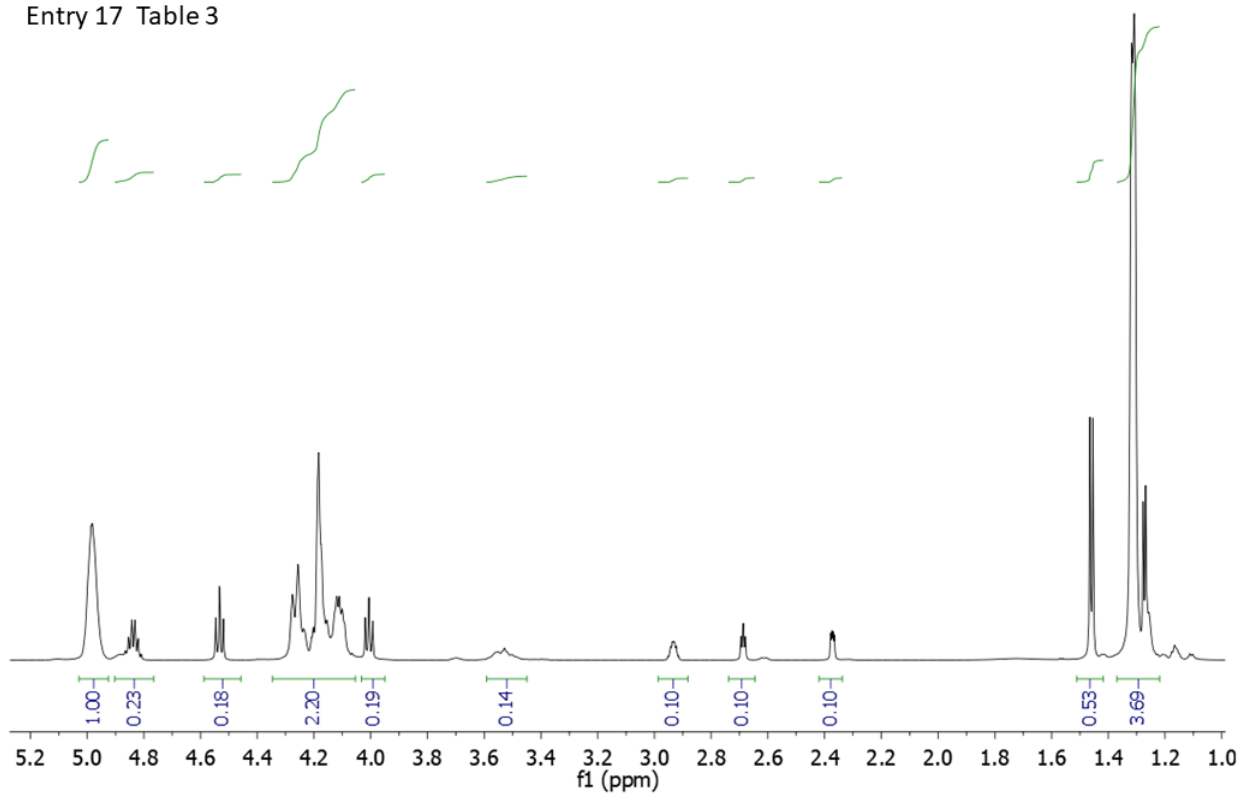

**Figure S9.**  $^1\text{H}$  NMR spectrum of crude polypropylene carbonate from PPZCl/**1d** (entry 17 in Table 3)

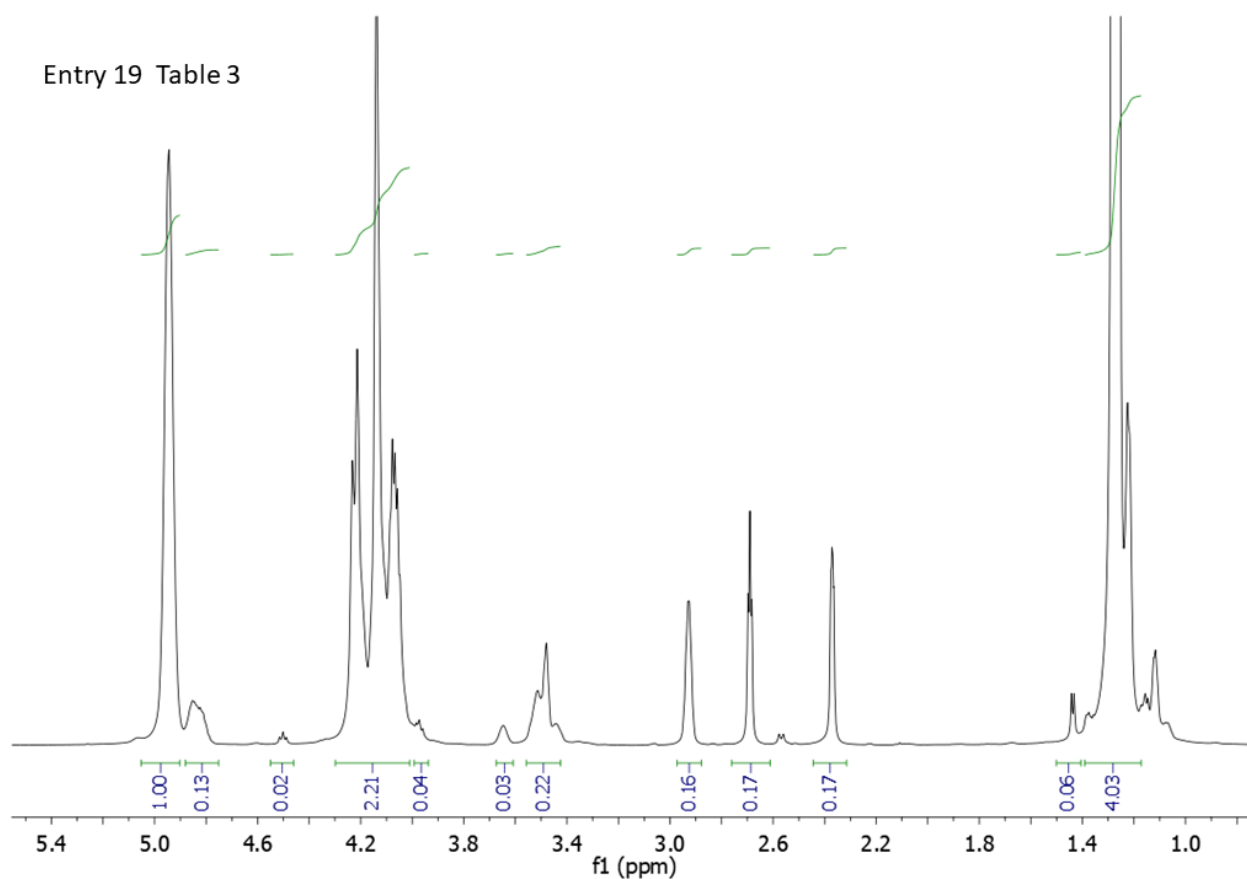

**Figure S10.**  $^1\text{H}$  NMR spectrum of crude polypropylene carbonate from PPZCl/**1d** (entry 17 in Table 3)

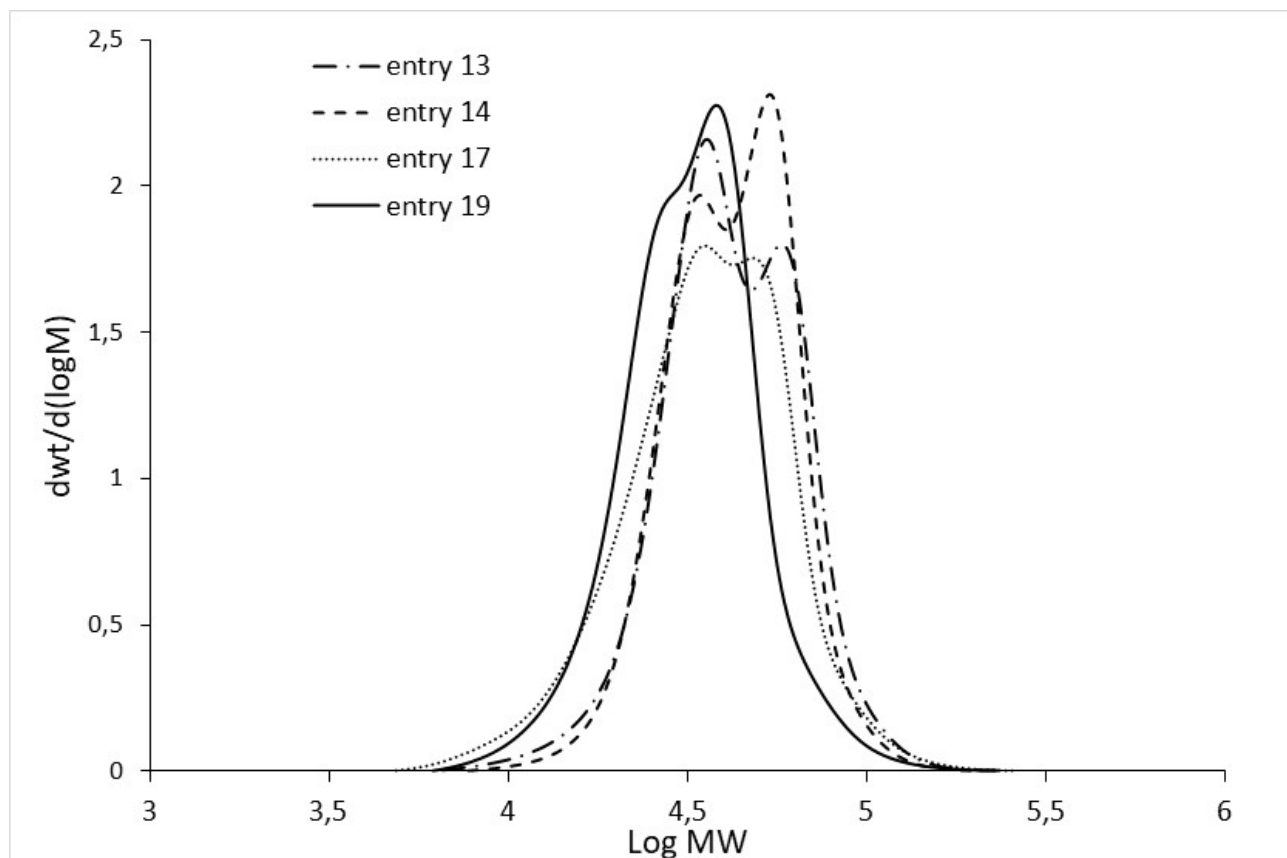

**Figure S11.** SEC chromatograms of selected samples from Table 3

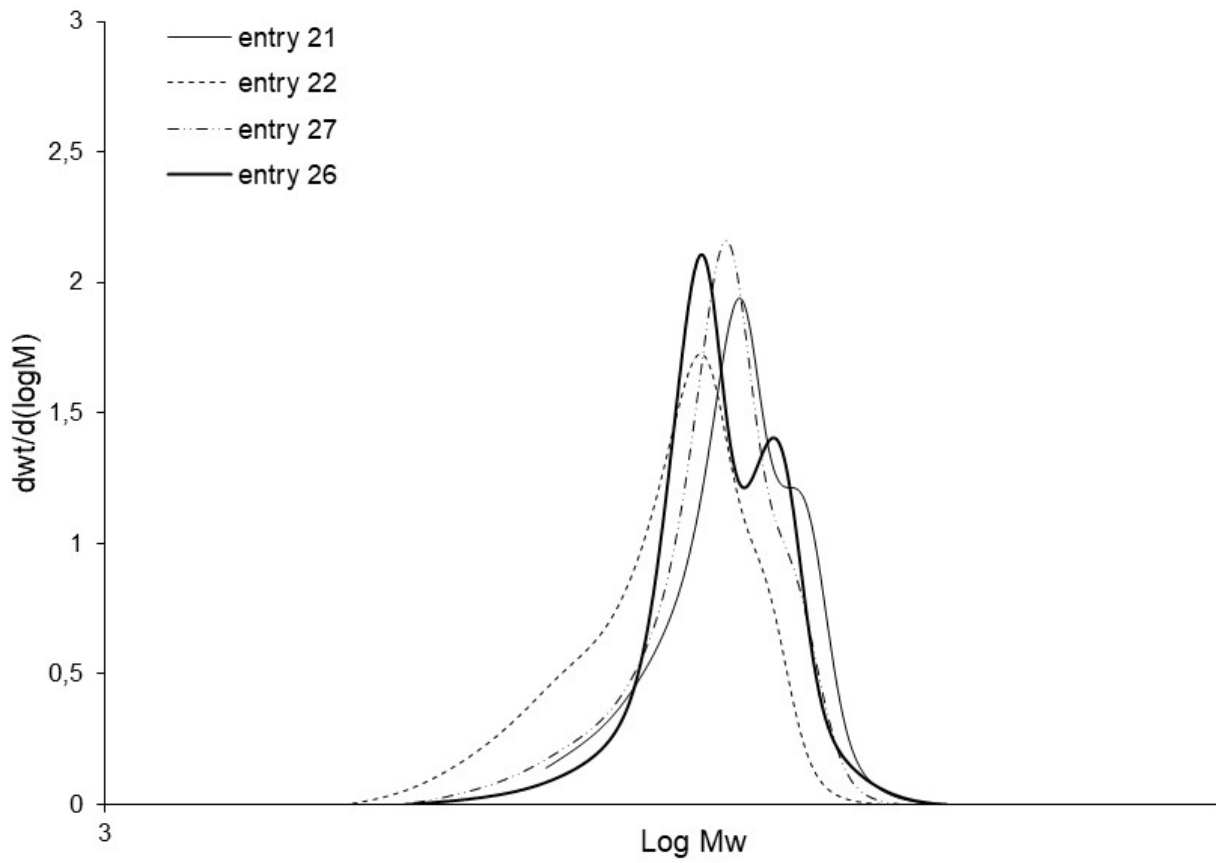

**Figure S12.** SEC chromatograms of selected entries in Table 4

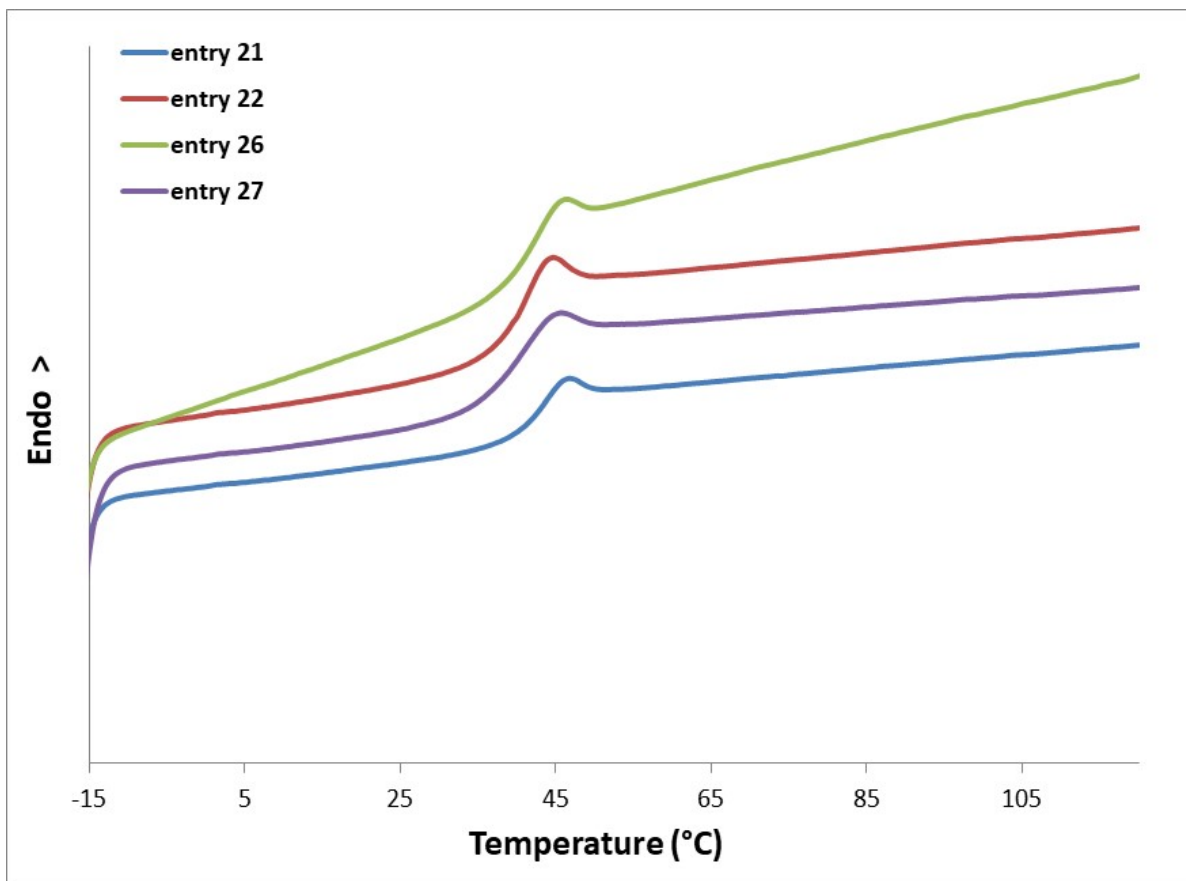

**Figure S13.** DSC curves of selected entries from Table 4

Entry 21 Table 4

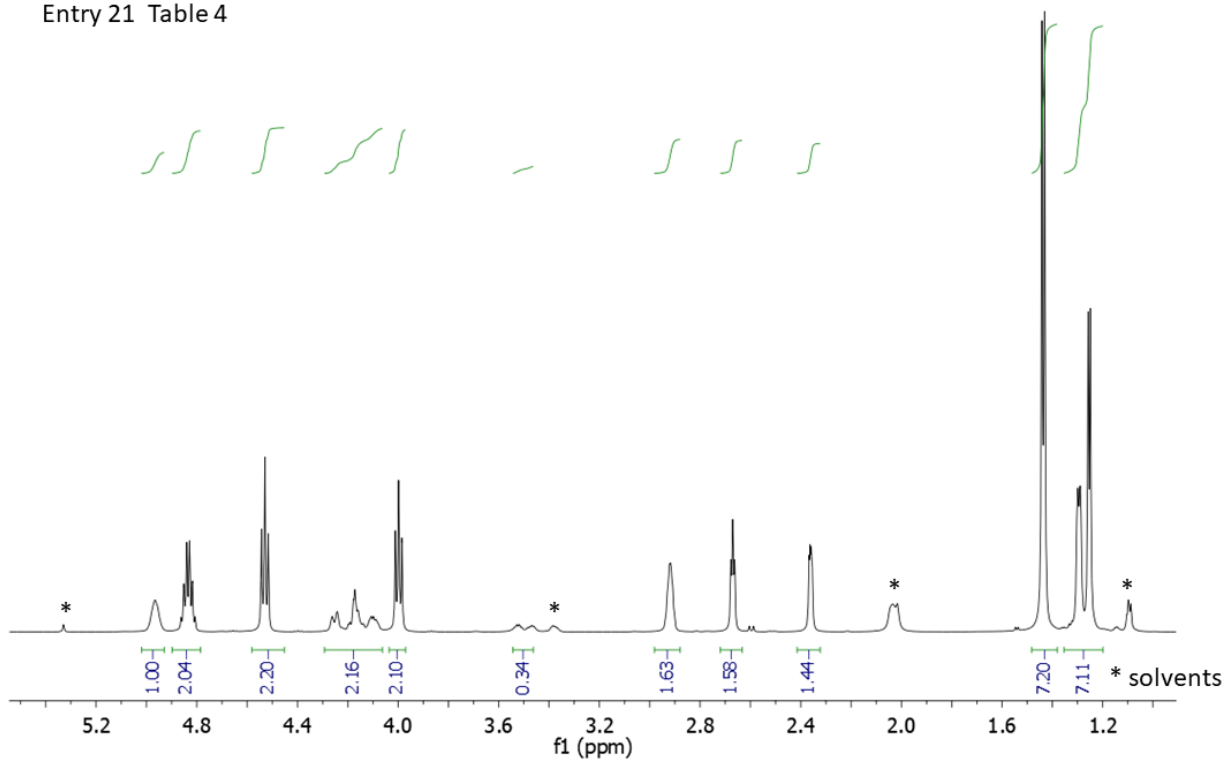

**Figure S14.** <sup>1</sup>H NMR spectrum of crude polypropylene carbonate from PPZN<sub>3</sub>/2a (entry 21 in Table 4)

Entry 22 Table 4

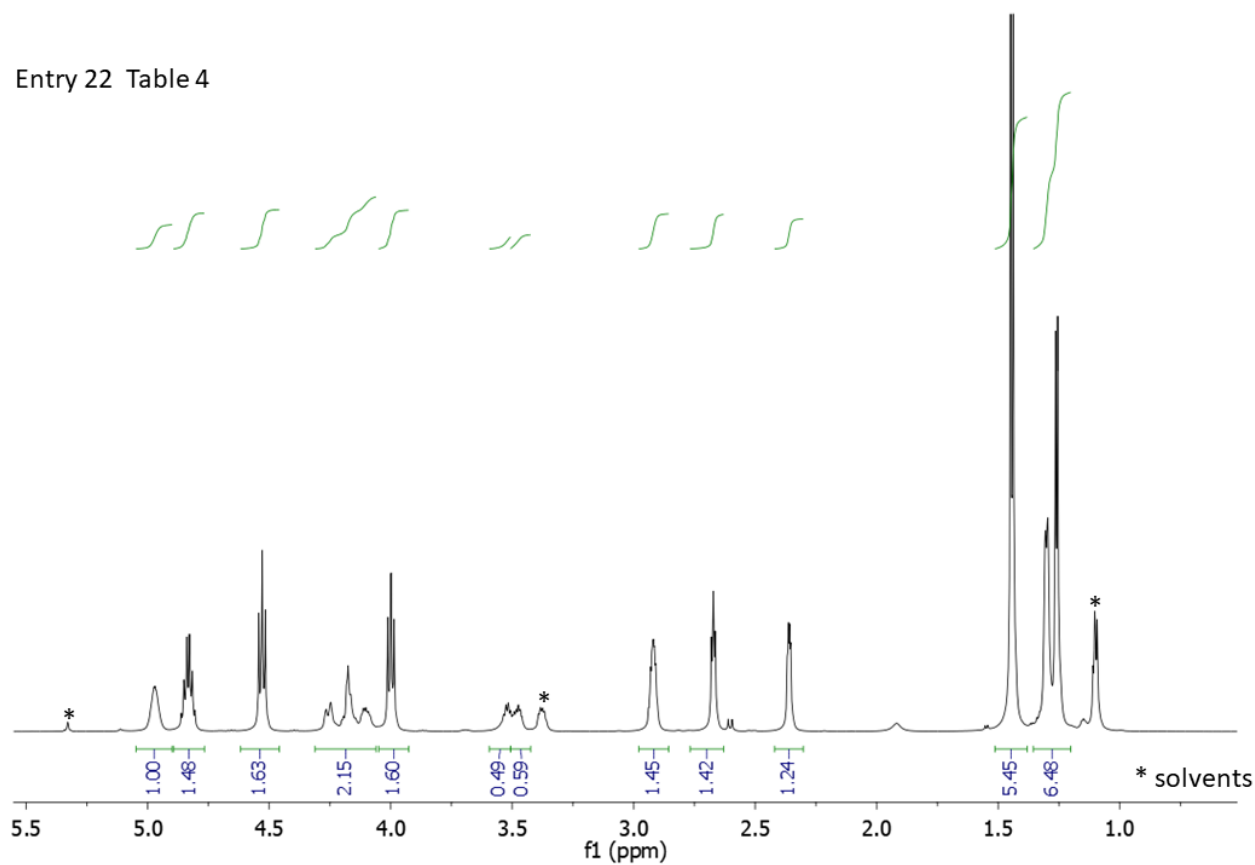



**Figure S15.**  $^1\text{H}$  NMR spectrum of crude polypropylene carbonate from  $\text{PPZN}_3/\mathbf{2a}$  (entry 22 in Table 4)

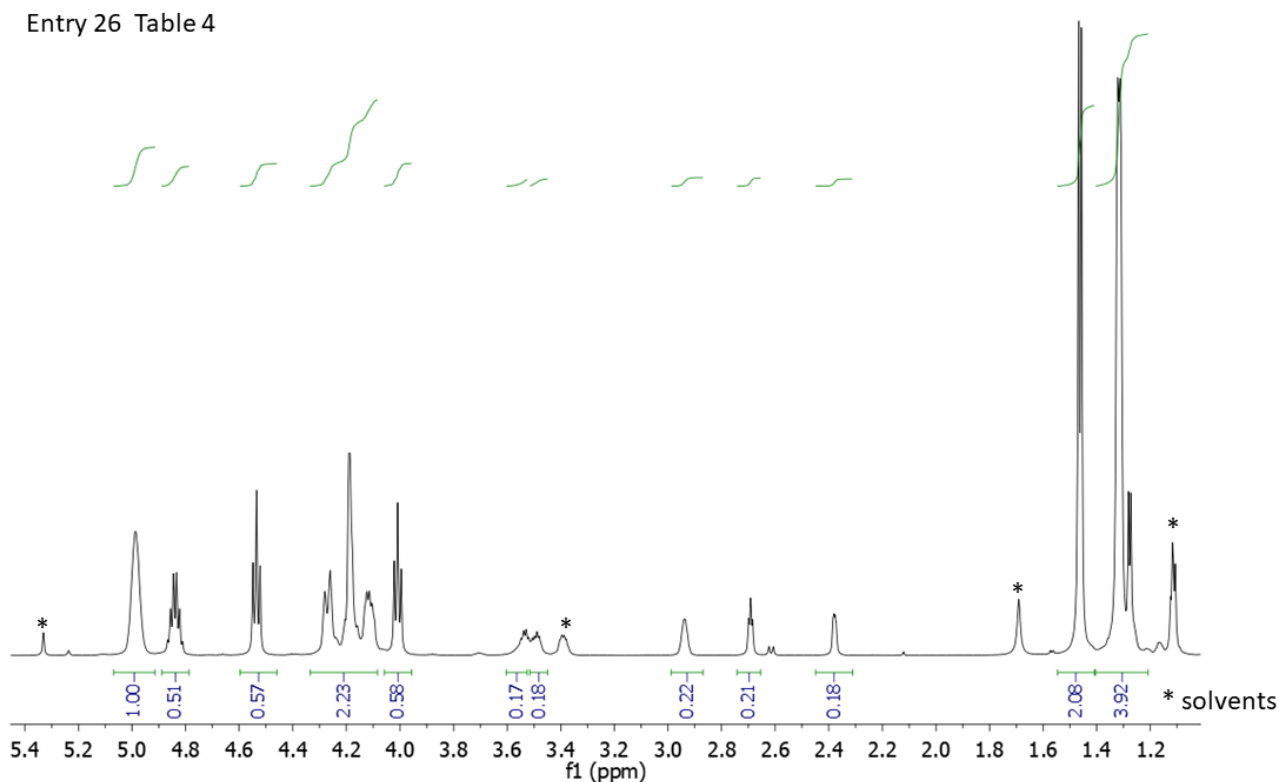

**Figure S16.**  $^1\text{H}$  NMR spectrum of crude polypropylene carbonate from  $\text{PPZCl}/\mathbf{2b}$  (entry 26 in Table 4)

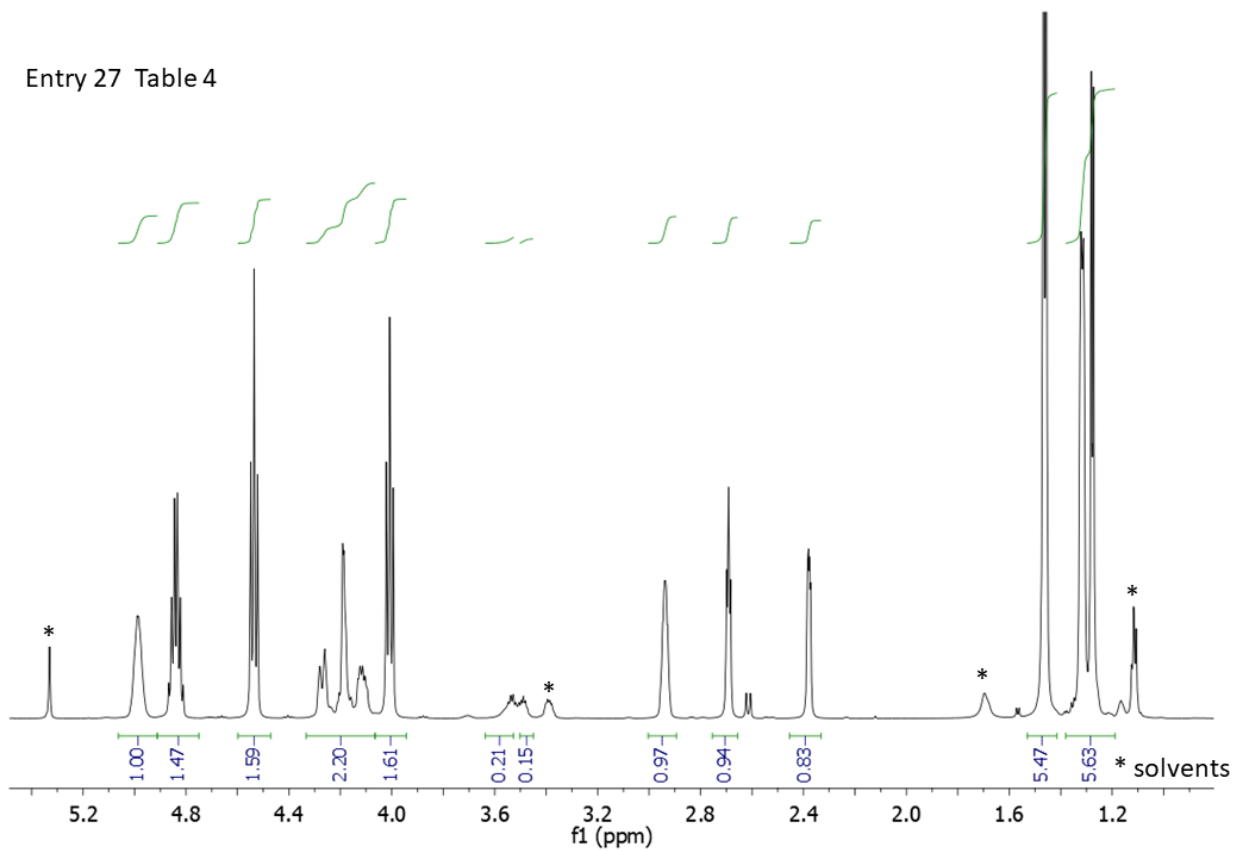

**Figure S17.**  $^1\text{H}$  NMR spectrum of crude polypropylene carbonate from  $\text{PPZN}_3/\mathbf{2b}$  (entry 27 in Table 4)

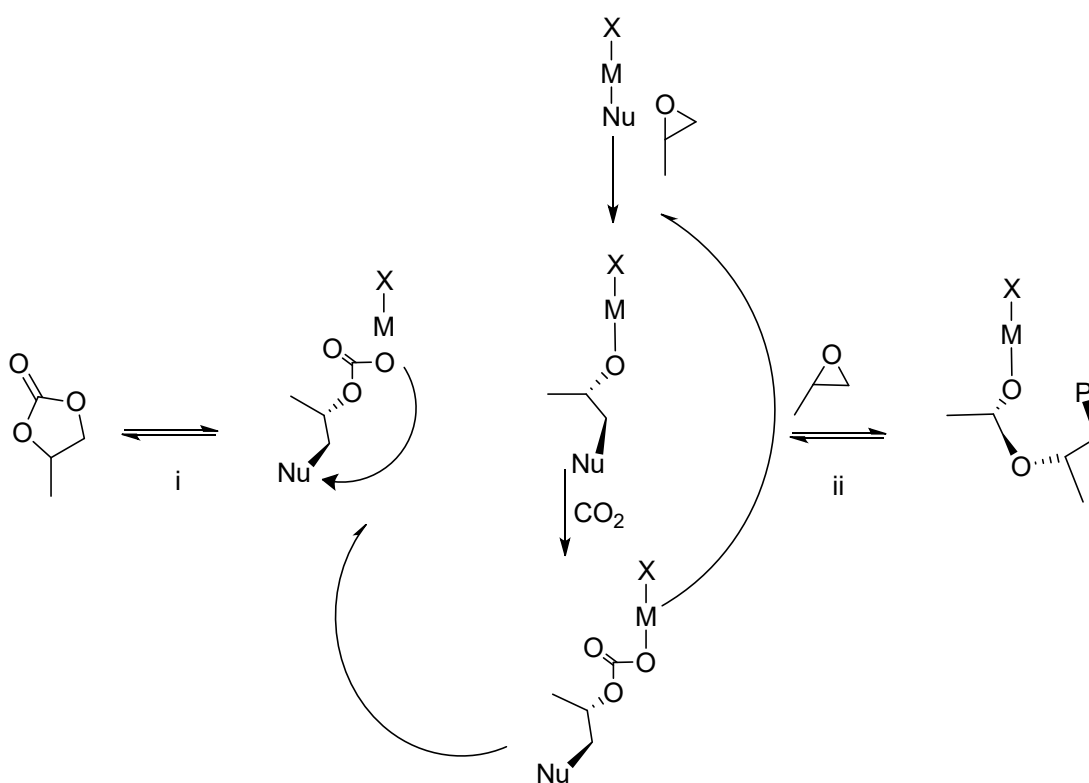

**Scheme S1.** General reaction mechanism to yield either polycarbonate or cyclic carbonate.

**Table S1.** Connolly Molecular Surface Area for the cocatalysts used in this work.

| Cocatalyst       | Molecular Area ( $\text{\AA}^2$ ) |
|------------------|-----------------------------------|
| PPNCl            | 360.0                             |
| PPN <sub>3</sub> | 370.3                             |
| PPZCl            | 465.3                             |
| PPZ <sub>3</sub> | 450.5                             |
| TPPCI            | 254.4                             |
| UHFFA            | 268.5                             |

Calculated with ChemDraw 3D by Chemoffice 20.0.
